# Supplementary material for: Early childhood linear growth faltering in low-income and middle-income countries as a whole-population condition: analysis of 179 Demographic and Health Surveys from 64 countries (1993–2015)
Source: PubMed Central journal article supplement (PMC5695758; doi:10.1016/s2214-109x(17)30418-7), 2017-11-10
Supplement: mmc1.pdf [file mmc1.pdf]

# THE LANCET

## Global Health

### Supplementary appendix

This appendix formed part of the original submission and has been peer reviewed. We post it as supplied by the authors.

Supplement to: Roth DE, Krishna A, Leung M, Shi J, Bassani DG, Barros AJD. Early childhood linear growth faltering in low-income and middle-income countries as a whole-population condition: analysis of 179 Demographic and Health Surveys from 64 countries (1993–2015). *Lancet Glob Health* 2017; **5**: e1249–57.

## Supplementary Material

### Supplementary Methods

#### 1) Anthropometry and Standardization of Lengths/Heights

Supine length (<24 months of age) and standing height (24 months or older) were measured to the nearest 0.1 cm by trained field personnel using portable wooden boards according to standard anthropometric techniques<sup>1</sup>. DHS protocols include multiple quality control methods, although the anthropometric data quality varies widely<sup>1</sup>. Sex- and age-standardized HAZ scores were generated using the World Health Organization (WHO) child growth standards<sup>2</sup>. The day, month and year of birth and of assessment were used to calculate age. If month and year of birth were available but not the day of birth, the day of birth was set to 15. If the date of birth or assessment was unavailable, then the age in months as imputed by DHS was converted to age in days (months x 30.4375).

#### 2) Random-intercept models to estimate international summary means and 95% confidence intervals for each distributional parameter within each age band (Aim #1)

We used random-intercept linear models without covariates to generate international summary means and 95% confidence intervals for each parameter, accounting for clustering of surveys within countries.

Separate models were run for each 3-month age band and for each parameter. In describing the model below, we refer to mean HAZ as the dependent variable, but used a similar approach for other distributional parameters:

$$\text{mean HAZ}_{jk} = \beta_0 + \mu_{0k} + e_{jk}$$

where survey year  $j$  is nested in country  $k$ .  $\beta_0$  is the fixed effect representing the overall mean HAZ across all surveys (for the particular age band).  $\mu_{0k}$  is the country-level random intercept and  $e_{jk}$  is the error term at the level of the survey.

### 3) Multilevel linear models to estimate associations between mean HAZ and other distributional parameters (Aim #2)

In describing the model below, we refer to SD as the dependent variable, but used a similar approach for other distributional parameters:

$$SD_{ijk} = \beta_0 + \beta_1(-meanHAZ_{ijk}) + \mu_{1jk}(-meanHAZ_{ijk}) + \mu_{0jk} + \mu_{0k} + e_{ijk}$$

where survey-age band  $i$  is nested in survey year  $j$  that is nested in country  $k$ .  $\beta_0$  is a fixed effect representing the overall mean SD when mean HAZ=0.  $\beta_1$  is a fixed effect representing the overall mean difference in SD for a one-unit decline in mean HAZ, and  $\mu_{1jk}$  is the survey-specific random slope for the association between SD and mean HAZ (i.e., accounts for between-survey variation around  $\beta_1$ ).  $\mu_{0jk}$  and  $\mu_{0k}$  are survey year- and country-level random intercepts, respectively (i.e., account for survey- and country-level variation around  $\beta_0$ ), and  $e_{ijk}$  is the error term at the level of the survey-age unit.

Models were estimated using unstructured covariance matrices for the random effects at the survey level. We did not use models that additionally included a random slope at the country level because they did not converge for all analyses; however, when they did converge, coefficients and residual variances were virtually unchanged from our main models (data not shown). For each of the random effects, we generated best linear unbiased predictions (BLUPS) for each survey to plot survey-specific slopes of the relationship between SD/p5/p95 and mean HAZ.

#### References

1. Assaf S, Kothari MT, Pullum T. An assessment of the quality of DHS anthropometric data, 2005-2014. Rockville, Maryland, USA: ICF International, 2015.
2. World Health Organization. WHO child growth standards : length/height-for-age, weight-for-age, weight-for-length, weight-for-height and body mass index-for-age : methods and development. Geneva: World Health Organization; 2006.

**Table S1.** Demographic and Health Surveys included in the study

| #   | Country                  | Year    |
|-----|--------------------------|---------|
| 1.  | Albania                  | 2008    |
| 2.  | Armenia                  | 2000    |
| 3.  | Armenia                  | 2005    |
| 4.  | Armenia                  | 2010    |
| 5.  | Azerbaijan               | 2006    |
| 6.  | Bangladesh               | 1996    |
| 7.  | Bangladesh               | 1999    |
| 8.  | Bangladesh               | 2004    |
| 9.  | Bangladesh               | 2007    |
| 10. | Bangladesh               | 2011    |
| 11. | Bangladesh               | 2014    |
| 12. | Benin                    | 1996    |
| 13. | Benin                    | 2001    |
| 14. | Benin                    | 2006    |
| 15. | Benin                    | 2011    |
| 16. | Bolivia                  | 1994    |
| 17. | Bolivia                  | 1998    |
| 18. | Bolivia                  | 2003    |
| 19. | Bolivia                  | 2008    |
| 20. | Brazil                   | 1996    |
| 21. | Burkina Faso             | 1998    |
| 22. | Burkina Faso             | 2003    |
| 23. | Burkina Faso             | 2010    |
| 24. | Burundi                  | 2010    |
| 25. | Central African Republic | 1994    |
| 26. | Cambodia                 | 2000    |
| 27. | Cambodia                 | 2005    |
| 28. | Cambodia                 | 2010    |
| 29. | Cambodia                 | 2014    |
| 30. | Cameroon                 | 1998    |
| 31. | Cameroon                 | 2004    |
| 32. | Cameroon                 | 2011    |
| 33. | Chad                     | 1996    |
| 34. | Chad                     | 2004    |
| 35. | Chad                     | 2014-15 |
| 36. | Colombia                 | 1995    |
| 37. | Colombia                 | 2000    |
| 38. | Colombia                 | 2005    |
| 39. | Colombia                 | 2010    |

| #   | Country                    | Year |
|-----|----------------------------|------|
| 40. | Comoros                    | 1996 |
| 41. | Comoros                    | 2012 |
| 42. | Congo Brazzaville          | 2005 |
| 43. | Congo Brazzaville          | 2011 |
| 44. | Congo, Democratic Republic | 2007 |
| 45. | Congo, Democratic Republic | 2013 |
| 46. | Cote d'Ivoire              | 1994 |
| 47. | Cote d'Ivoire              | 1998 |
| 48. | Cote d'Ivoire              | 2011 |
| 49. | Dominican Republic         | 1996 |
| 50. | Dominican Republic         | 2002 |
| 51. | Dominican Republic         | 2007 |
| 52. | Dominican Republic         | 2013 |
| 53. | Egypt                      | 1995 |
| 54. | Egypt                      | 2000 |
| 55. | Egypt                      | 2005 |
| 56. | Egypt                      | 2008 |
| 57. | Egypt                      | 2014 |
| 58. | Ethiopia                   | 2000 |
| 59. | Ethiopia                   | 2005 |
| 60. | Ethiopia                   | 2011 |
| 61. | Gabon                      | 2000 |
| 62. | Gabon                      | 2012 |
| 63. | Gambia                     | 2013 |
| 64. | Ghana                      | 1993 |
| 65. | Ghana                      | 1998 |
| 66. | Ghana                      | 2003 |
| 67. | Ghana                      | 2008 |
| 68. | Guatemala                  | 1995 |
| 69. | Guatemala                  | 1998 |
| 70. | Guinea                     | 1999 |
| 71. | Guinea                     | 2005 |
| 72. | Guinea                     | 2012 |
| 73. | Guyana                     | 2009 |
| 74. | Haiti                      | 1994 |
| 75. | Haiti                      | 2000 |
| 76. | Haiti                      | 2005 |
| 77. | Haiti                      | 2012 |
| 78. | Honduras                   | 2005 |
| 79. | Honduras                   | 2011 |
| 80. | India                      | 1998 |
| 81. | India                      | 2005 |

| #    | Country    | Year    |
|------|------------|---------|
| 82.  | Jordan     | 1997    |
| 83.  | Jordan     | 2002    |
| 84.  | Jordan     | 2007    |
| 85.  | Jordan     | 2012    |
| 86.  | Kazakhstan | 1995    |
| 87.  | Kazakhstan | 1999    |
| 88.  | Kenya      | 1993    |
| 89.  | Kenya      | 1998    |
| 90.  | Kenya      | 2003    |
| 91.  | Kenya      | 2008    |
| 92.  | Kenya      | 2014    |
| 93.  | Kyrgyzstan | 1997    |
| 94.  | Kyrgyzstan | 2012    |
| 95.  | Lesotho    | 2004    |
| 96.  | Lesotho    | 2009    |
| 97.  | Lesotho    | 2014    |
| 98.  | Liberia    | 2007    |
| 99.  | Liberia    | 2013    |
| 100. | Madagascar | 1997    |
| 101. | Madagascar | 2003    |
| 102. | Madagascar | 2008-09 |
| 103. | Malawi     | 2000    |
| 104. | Malawi     | 2004    |
| 105. | Malawi     | 2010    |
| 106. | Maldives   | 2009    |
| 107. | Mali       | 1995    |
| 108. | Mali       | 2001    |
| 109. | Mali       | 2006    |
| 110. | Mali       | 2012    |
| 111. | Moldova    | 2005    |
| 112. | Morocco    | 2003    |
| 113. | Mozambique | 1997    |
| 114. | Mozambique | 2003    |
| 115. | Mozambique | 2011    |
| 116. | Namibia    | 2000    |
| 117. | Namibia    | 2006    |
| 118. | Namibia    | 2013    |
| 119. | Nepal      | 1996    |
| 120. | Nepal      | 2001    |
| 121. | Nepal      | 2006    |
| 122. | Nepal      | 2011    |
| 123. | Nicaragua  | 1997    |

| #    | Country               | Year    |
|------|-----------------------|---------|
| 124. | Nicaragua             | 2001    |
| 125. | Niger                 | 1998    |
| 126. | Niger                 | 2006    |
| 127. | Niger                 | 2012    |
| 128. | Nigeria               | 1999    |
| 129. | Nigeria               | 2003    |
| 130. | Nigeria               | 2008    |
| 131. | Nigeria               | 2013    |
| 132. | Pakistan              | 2012    |
| 133. | Peru                  | 1996    |
| 134. | Peru                  | 2000    |
| 135. | Peru                  | 2005    |
| 136. | Peru                  | 2007    |
| 137. | Peru                  | 2008    |
| 138. | Peru                  | 2009    |
| 139. | Peru                  | 2010    |
| 140. | Peru                  | 2011    |
| 141. | Peru                  | 2012    |
| 142. | Rwanda                | 2000    |
| 143. | Rwanda                | 2005    |
| 144. | Rwanda                | 2010    |
| 145. | Rwanda                | 2014-15 |
| 146. | Sao Tome and Principe | 2008    |
| 147. | Senegal               | 2005    |
| 148. | Senegal               | 2010    |
| 149. | Senegal               | 2012    |
| 150. | Senegal               | 2014    |
| 151. | Sierra Leone          | 2008    |
| 152. | Sierra Leone          | 2013    |
| 153. | Swaziland             | 2006    |
| 154. | Tajikistan            | 2012    |
| 155. | Tanzania              | 1996    |
| 156. | Tanzania              | 1999    |
| 157. | Tanzania              | 2004    |
| 158. | Tanzania              | 2010    |
| 159. | Tanzania              | 2015-16 |
| 160. | Timor Leste           | 2009    |
| 161. | Togo                  | 1998    |
| 162. | Togo                  | 2013    |
| 163. | Turkey                | 1993    |
| 164. | Turkey                | 1998    |
| 165. | Turkey                | 2003    |

| #    | Country    | Year    |
|------|------------|---------|
| 166. | Uganda     | 1995    |
| 167. | Uganda     | 2000    |
| 168. | Uganda     | 2006    |
| 169. | Uganda     | 2011    |
| 170. | Uzbekistan | 1996    |
| 171. | Zambia     | 1996    |
| 172. | Zambia     | 2001    |
| 173. | Zambia     | 2007    |
| 174. | Zambia     | 2013-14 |
| 175. | Zimbabwe   | 1994    |
| 176. | Zimbabwe   | 1999    |
| 177. | Zimbabwe   | 2005    |
| 178. | Zimbabwe   | 2010    |
| 179. | Zimbabwe   | 2015    |



**Table S2.** Demographic and Health surveys from 1993 to 2015 excluded from the study due to lack of anthropometric data, surveys were interim, or data access was restricted.

| #   | Country            | Year    |
|-----|--------------------|---------|
| 1.  | Bangladesh         | 1993    |
| 2.  | Dominican Republic | 1999    |
| 3.  | Egypt              | 2003    |
| 4.  | Eritrea            | 1995    |
| 5.  | Eritrea            | 2002    |
| 6.  | Guatemala          | 2008    |
| 7.  | Indonesia          | 1994    |
| 8.  | Indonesia          | 1997    |
| 9.  | Indonesia          | 2002    |
| 10. | Indonesia          | 2007    |
| 11. | Indonesia          | 2012    |
| 12. | Jordan             | 2009    |
| 13. | Madagascar         | 2008    |
| 14. | Mauritania         | 2000-01 |
| 15. | Pakistan           | 2006    |
| 16. | Peru               | 2004    |
| 17. | Peru               | 2006    |
| 18. | Philippines        | 1993    |
| 19. | Philippines        | 1998    |
| 20. | Philippines        | 2003    |
| 21. | Philippines        | 2008    |
| 22. | Philippines        | 2013    |
| 23. | Senegal            | 1997    |
| 24. | South Africa       | 1998    |
| 25. | Ukraine            | 2007    |
| 26. | Vietnam            | 1997    |
| 27. | Vietnam            | 2002    |
| 28. | Yemen              | 1997    |
| 29. | Yemen              | 2013    |

**Table S3.** Means, standard deviations, 5<sup>th</sup> percentiles, and 95<sup>th</sup> percentiles of height-for-age z-score (HAZ) distributions in three-month age bands from 0 to 35 months of age, averaged across 179 demographic and health surveys from low- and middle-income countries (n=2,148 survey-age units)

| Age band <sup>1</sup> | Number of children per survey, median (min, max) | Mean HAZ, Mean (95% CI) | Standard deviation, Mean (95% CI) | 5th percentile, Mean (95% CI) | 95th percentile, Mean (95% CI) | Change from <3-month age band |                |                 |
|-----------------------|--------------------------------------------------|-------------------------|-----------------------------------|-------------------------------|--------------------------------|-------------------------------|----------------|-----------------|
|                       |                                                  |                         |                                   |                               |                                | Mean HAZ                      | 5th percentile | 95th percentile |
| 0 to <3m              | 276 (26, 2473)                                   | -0.44 (-0.54, -0.34)    | 2.11 (2.00, 2.22)                 | -3.89 (-4.14, -3.64)          | 2.91 (2.67, 3.15)              | 0                             | 0              | 0               |
| 3 to <6m              | 282 (24, 2683)                                   | -0.51 (-0.61, -0.41)    | 2.00 (1.89, 2.11)                 | -3.75 (-4.01, -3.50)          | 2.64 (2.40, 2.88)              | -0.07                         | 0.14           | -0.27           |
| 6 to <9m              | 280 (27, 2373)                                   | -0.68 (-0.79, -0.56)    | 1.95 (1.86, 2.04)                 | -3.77 (-4.01, -3.54)          | 2.41 (2.21, 2.61)              | -0.24                         | 0.12           | -0.50           |
| 9 to 12m              | 261 (29, 2162)                                   | -0.91 (-1.02, -0.80)    | 1.91 (1.81, 2.01)                 | -3.94 (-4.18, -3.70)          | 2.26 (2.00, 2.52)              | -0.47                         | -0.05          | -0.65           |
| 12 to <15m            | 277 (29, 2527)                                   | -1.18 (-1.30, -1.07)    | 1.89 (1.79, 1.98)                 | -4.08 (-4.28, -3.87)          | 1.86 (1.62, 2.10)              | -0.74                         | -0.19          | -1.05           |
| 15 to <18m            | 256 (32, 2502)                                   | -1.41 (-1.54, -1.28)    | 1.89 (1.79, 1.99)                 | -4.29 (-4.52, -4.06)          | 1.79 (1.51, 2.08)              | -0.97                         | -0.40          | -1.12           |
| 18 to <21m            | 251 (20, 2372)                                   | -1.63 (-1.77, -1.49)    | 1.80 (1.72, 1.89)                 | -4.42 (-4.62, -4.21)          | 1.39 (1.14, 1.63)              | -1.19                         | -0.53          | -1.52           |
| 21 to <24m            | 238 (38, 1939)                                   | -1.71 (-1.85, -1.56)    | 1.78 (1.70, 1.85)                 | -4.50 (-4.71, -4.28)          | 1.15 (0.96, 1.35)              | -1.27                         | -0.61          | -1.76           |
| 24 to <27m            | 273 (32, 2370)                                   | -1.62 (-1.75, -1.48)    | 1.76 (1.68, 1.84)                 | -4.35 (-4.55, -4.16)          | 1.37 (1.16, 1.59)              | -1.18                         | -0.46          | -1.54           |
| 27 to <30m            | 252 (36, 2464)                                   | -1.74 (-1.88, -1.60)    | 1.68 (1.60, 1.75)                 | -4.46 (-4.66, -4.25)          | 1.03 (0.84, 1.22)              | -1.30                         | -0.57          | -1.88           |
| 30 to <33m            | 241 (28, 2331)                                   | -1.77 (-1.92, -1.61)    | 1.66 (1.58, 1.74)                 | -4.47 (-4.69, -4.25)          | 0.93 (0.72, 1.15)              | -1.33                         | -0.58          | -1.98           |
| 33 to <36m            | 231 (28, 2143)                                   | -1.79 (-1.93, -1.64)    | 1.65 (1.58, 1.72)                 | -4.47 (-4.68, -4.25)          | 0.84 (0.66, 1.02)              | -1.35                         | -0.58          | -2.07           |

<sup>1</sup> Age band assignment of each child was based on age in days, whereby 1 month=30.4375 days; therefore, the youngest age band is from 0 to 91.31 days.

**Table S4.** Estimates of the associations between distributional parameters and mean of the height-for-age z-score (HAZ) distributions in sensitivity analyses.

| Sensitivity analysis                              | # of survey-age units | Estimated mean change in parameter (95% confidence interval) for a 1-unit decline in mean HAZ |                         |                                   |                                    |
|---------------------------------------------------|-----------------------|-----------------------------------------------------------------------------------------------|-------------------------|-----------------------------------|------------------------------------|
|                                                   |                       | Standard deviation                                                                            | Median                  | $\Delta 5^{\text{th}}$ percentile | $\Delta 95^{\text{th}}$ percentile |
| Restricted to <24 months, using 3-month age bands | 1,432                 | -0.15<br>(-0.18, -0.13)                                                                       | -1.00<br>(-1.01, -0.99) | -0.27<br>(-0.33, -0.21)           | -0.24<br>(-0.30, -0.18)            |
| Excluding HAZ values <-6 or >6                    | 2,148                 | -0.11<br>(-0.13, -0.10)                                                                       | -1.02<br>(-1.02, -1.01) | -0.24<br>(-0.27, -0.20)           | -0.16<br>(-0.20, -0.12)            |
| Based on 1-month age bands                        | 6,444                 | -0.19<br>(-0.21, -0.17)                                                                       | -0.95<br>(-0.96, -0.94) | -0.20<br>(-0.24, -0.15)           | -0.41<br>(-0.46, -0.36)            |
| Based on 6-month age bands                        | 1,074                 | -0.21<br>(-0.23, -0.18)                                                                       | -0.99<br>(-1.00, -0.98) | -0.32<br>(-0.38, -0.26)           | -0.28<br>(-0.34, -0.23)            |

**A**

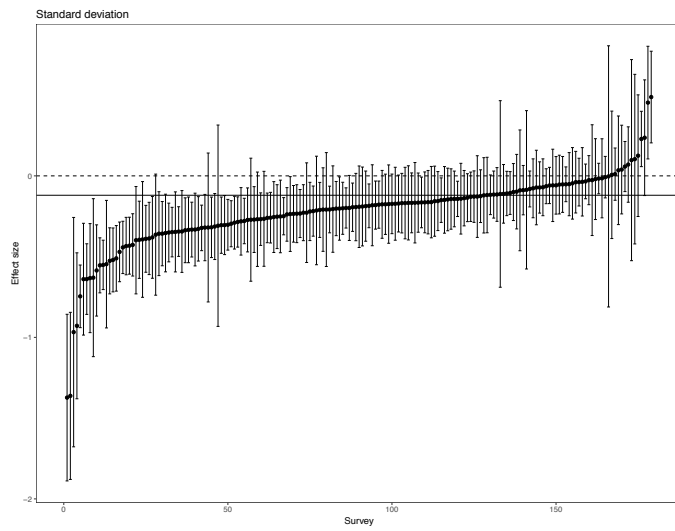

**B**

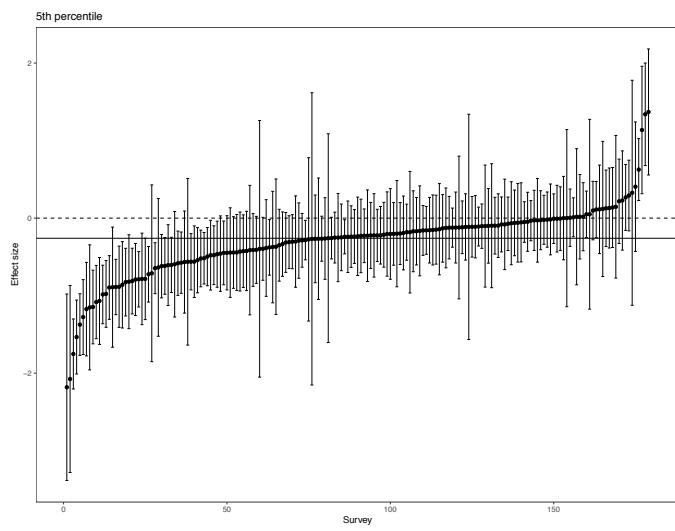

**C**

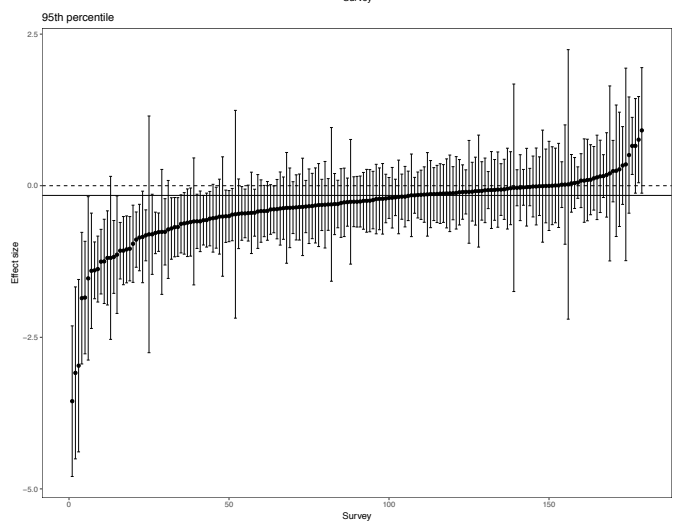

**Figure S1.** *Figure legend on next page*

**Figure S1.** Forest plots of 179 survey-specific estimates of the associations (and 95% confidence intervals) between the standard deviation (A), 5<sup>th</sup> percentile (B), and 95<sup>th</sup> percentile (C) of the height-for-age z-score (HAZ) distribution and mean HAZ. Estimates were based on fixed effects linear regression models that included interactions between survey and mean HAZ. Solid horizontal lines indicate the estimate of the grand mean slope from the corresponding multi-level model. Dashed horizontal lines indicate 0. In each panel, surveys are ordered along the x-axis by ascending magnitude of the survey-specific point estimate. For the association between standard deviation and mean HAZ (panel A), three surveys had point estimates and 95% confidence intervals above 0:

- Uzbekistan 1996: 0.23 (95% CI: 0.06, 0.40), n=1024;
- Sao Tome and Principe 2008: 0.45 (95% CI: 0.10, 0.80), n=1190;
- Guyana 2009: 0.49 (95% CI: 0.20, 0.77), n=1185.

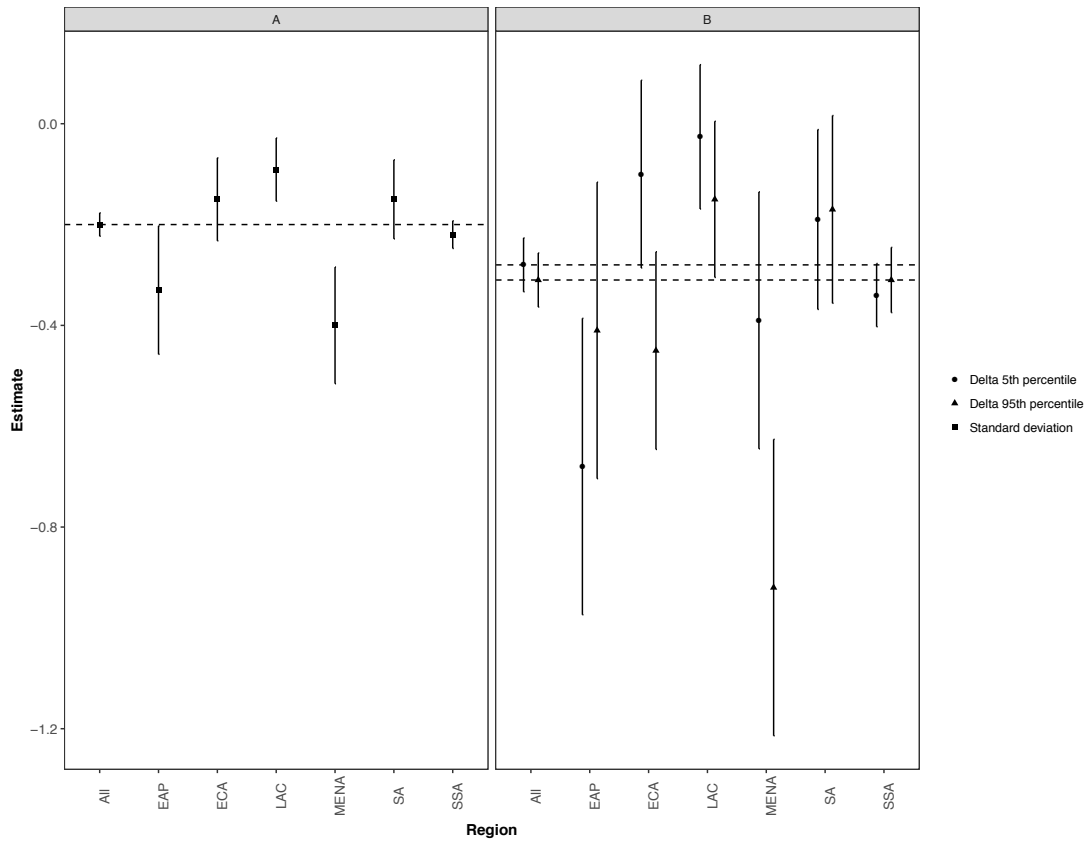

**Figure S2.** Estimates (and 95% confidence intervals) of the associations between the standard deviation (A), distance from mean to 5<sup>th</sup> percentile (B), and distance from mean to 95<sup>th</sup> percentile (B) of the height-for-age z-score (HAZ) distribution and mean HAZ in surveys stratified by World Bank world region: EAP= East Asia and Pacific; ECA = Europe and Central Asia; LAC= Latin America and Caribbean; MENA=Middle East and North Africa; SA=South Asia; SSA=sub-Saharan Africa. The dashed horizontal lines correspond to the overall (“all”) point estimates for slopes of the standard deviation (panel A), distance from mean to the 5<sup>th</sup> percentile (B, lower line), and distance from mean to the 95<sup>th</sup> percentile (B, upper line).

(B)

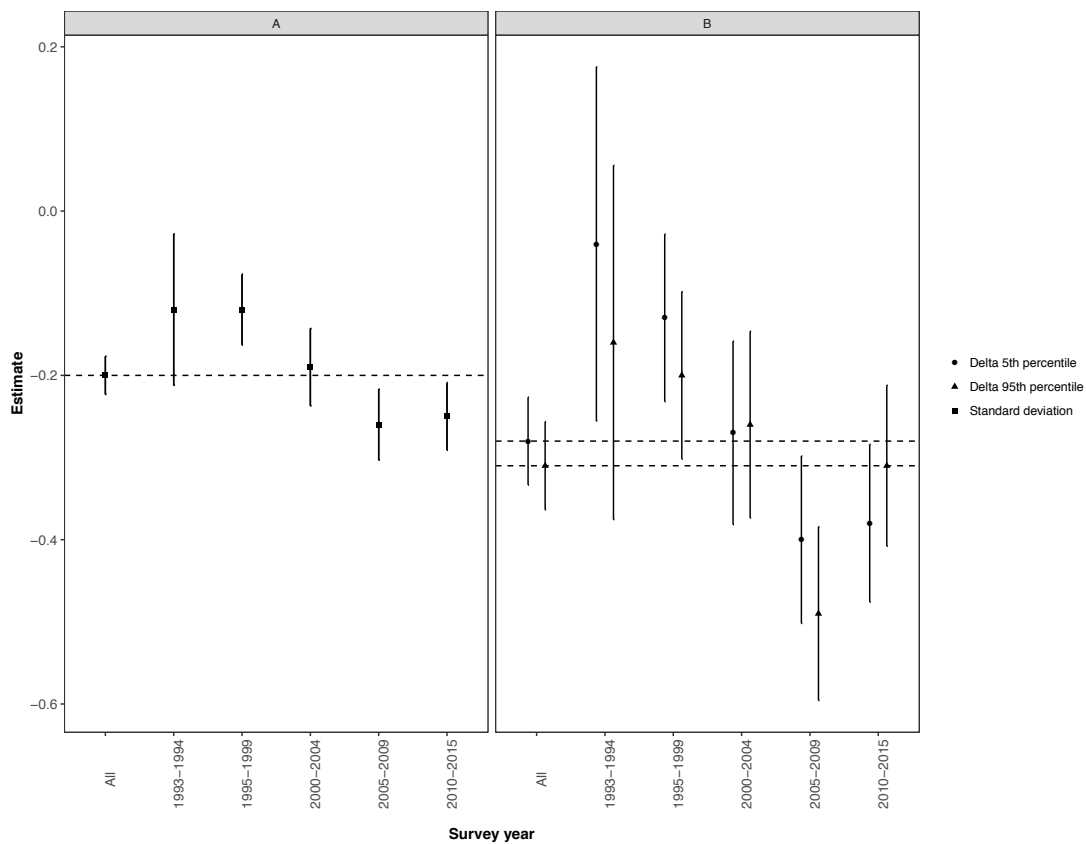

**Figure S3.** Estimates (and 95% confidence intervals) of the associations between the standard deviation (A), distance from mean to 5<sup>th</sup> percentile (B), and distance from mean to 95<sup>th</sup> percentile (B) of the height-for-age z-score (HAZ) distribution and mean HAZ in surveys stratified by survey year period. The dashed horizontal lines correspond to the overall (“all”) point estimates for slopes of the standard deviation (panel A), distance from mean to the 5<sup>th</sup> percentile (B, lower line), and distance from mean to the 95<sup>th</sup> percentile (B, upper line).

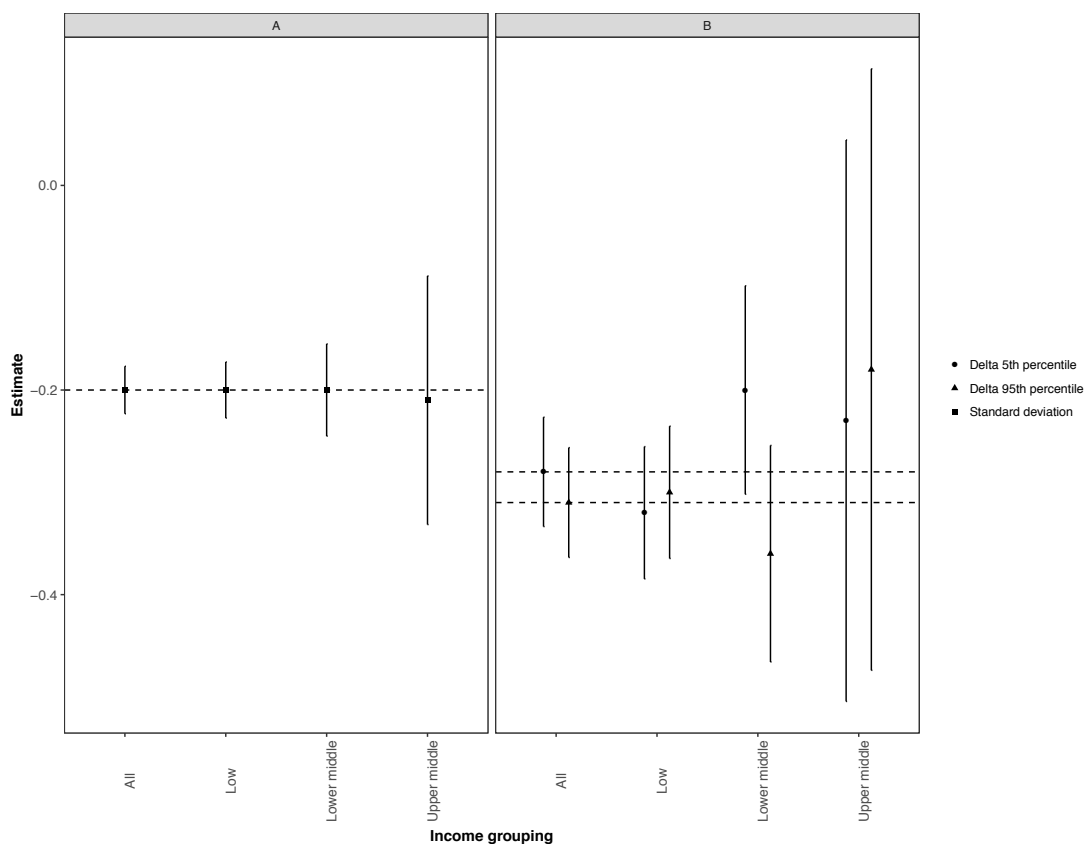

**Figure S4.** Estimates (and 95% confidence intervals) of the associations between the standard deviation (A), distance from mean to 5<sup>th</sup> percentile (B), and distance from mean to 95<sup>th</sup> percentile (B) of the height-for-age z-score (HAZ) distribution and mean HAZ in surveys stratified by World Bank income grouping. The dashed horizontal lines correspond to the overall (“all”) point estimates for slopes of the standard deviation (panel A), distance from mean to the 5<sup>th</sup> percentile (B, lower line), and distance from mean to the 95<sup>th</sup> percentile (B, upper line).



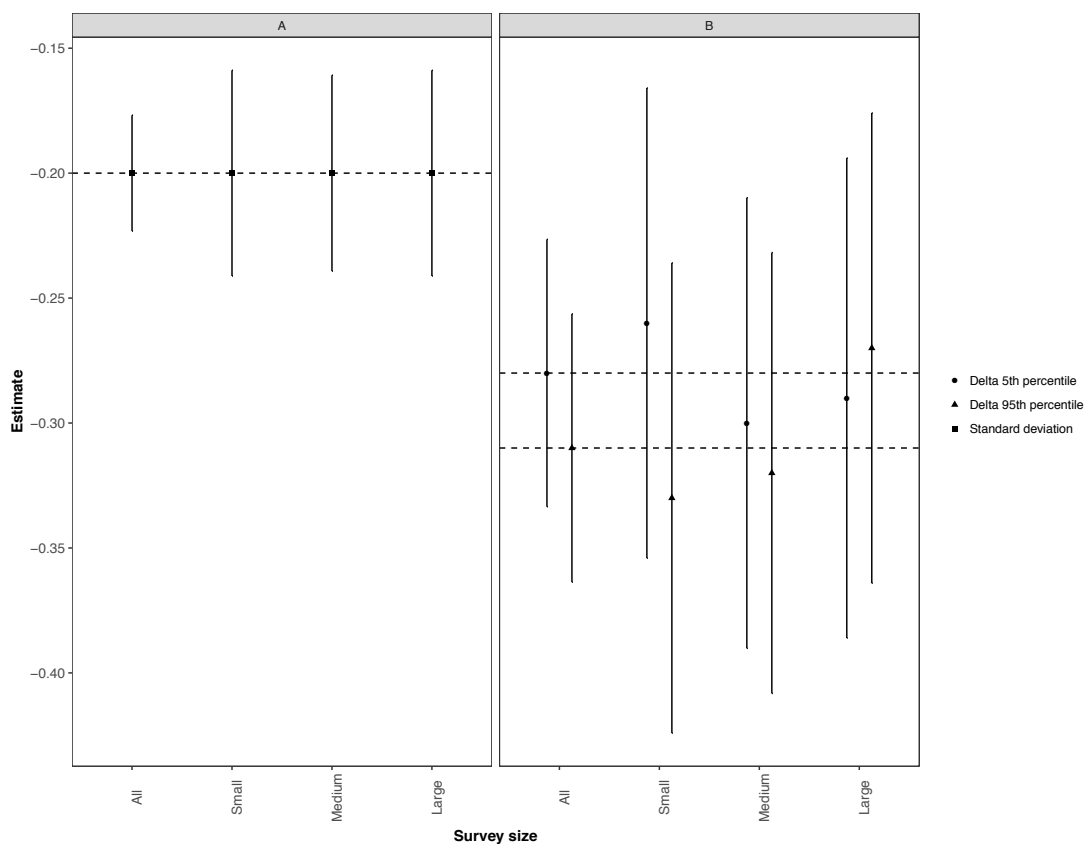

**Figure S5.** Estimates (and 95% confidence intervals) of the associations between the standard deviation (A), distance from mean to 5<sup>th</sup> percentile (B), and distance from mean to 95<sup>th</sup> percentile (B) of the height-for-age z-score (HAZ) distribution and mean HAZ in surveys stratified by survey size tertiles: Small: 351 to 2,471; Medium: 2,557 to 3,813; Large: 3,824 to 27,352. The dashed horizontal lines correspond to the overall (“all”) point estimates for slopes of the standard deviation (panel A), distance from mean to the 5<sup>th</sup> percentile (B, lower line), and distance from mean to the 95<sup>th</sup> percentile (B, upper line).

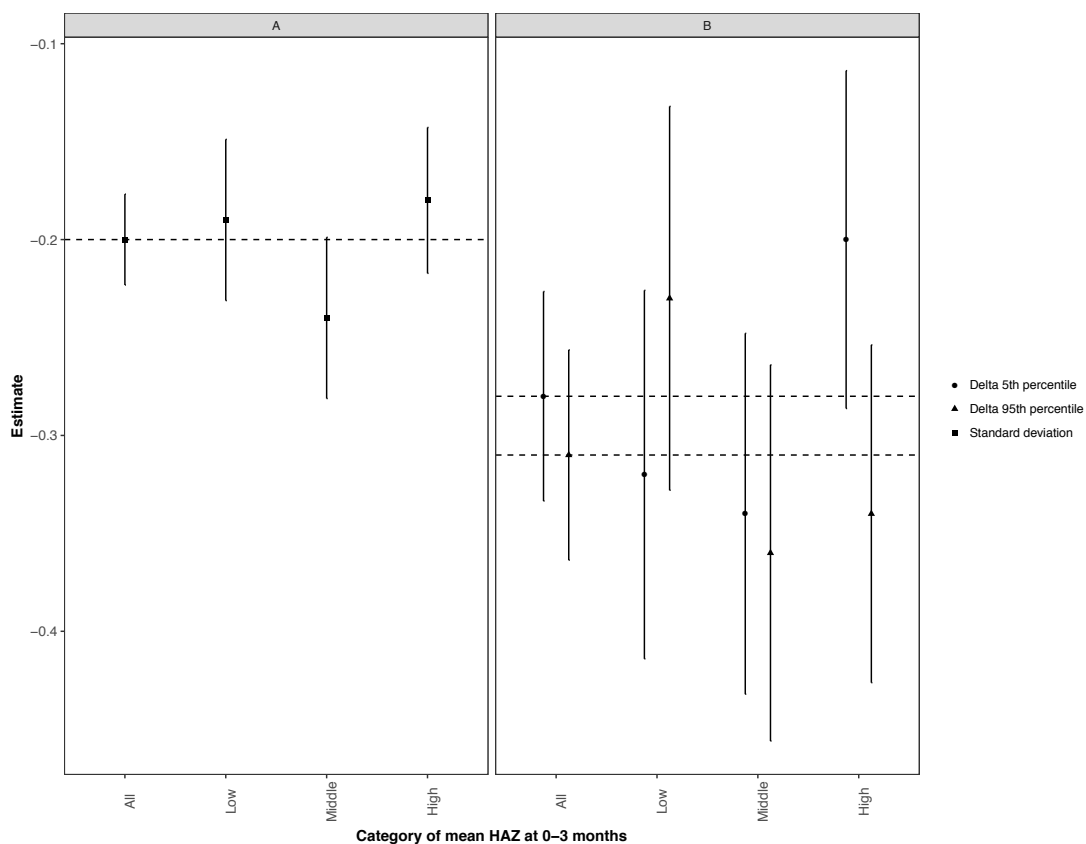

**Figure S6.** Estimated associations (and 95% confidence intervals) between the standard deviation (A), distance from mean to 5<sup>th</sup> percentile (B), and distance from mean to 95<sup>th</sup> percentile (B) of the height-for-age z-score (HAZ) distribution and mean HAZ in surveys stratified by tertiles of mean HAZ in the youngest age band (0 to <3 months):

Low: -2.07 to -0.58; Middle: -0.58 to -0.31; High: -0.31 to 0.79.

The dashed horizontal lines correspond to the overall (“all”) point estimates for slopes of the standard deviation (panel A), distance from mean to the 5<sup>th</sup> percentile (B, lower line), and distance from mean to the 95<sup>th</sup> percentile (B, upper line).

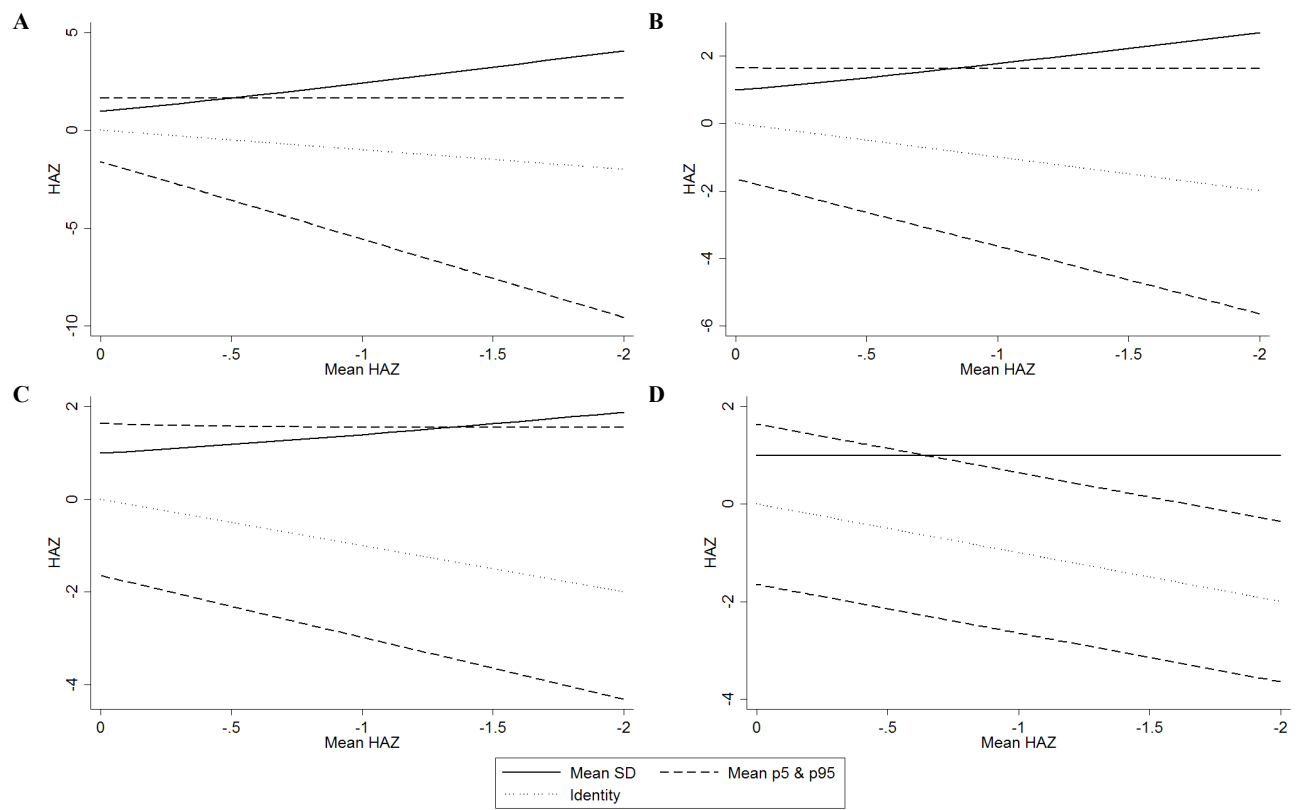

Figure S7. Figure legend on next page

**Figure S7.** Simulations with a higher risk of exposure at lower HAZ. The effect of a set of growth-limiting exposures on the standard deviation (SD), 5th percentile (p5) and 95th percentile (p95) of the height-for-age z-score (HAZ) distribution was simulated in a population of 10,000 children with an initial mean HAZ=0 and SD=1. Monte Carlo simulation (1000 repetitions) was used to simulate a faltering process in which the mean HAZ declined from 0 to -2 via cumulative 0.1 decrements in a fixed group of 'exposed' children. Lines represent smoothed trends of the average SD, p5 and p95. Scenarios A-D differ only with respect to the proportion of the population that was selected to be exposed to the set of growth-limiting factors (A=25%, B=50%, C=75%, D=100%).

Children with lower HAZ at the start of the simulation were preferentially selected into the exposure group (e.g., in Scenario A, we selected the 2,500 children with the lowest HAZ values).

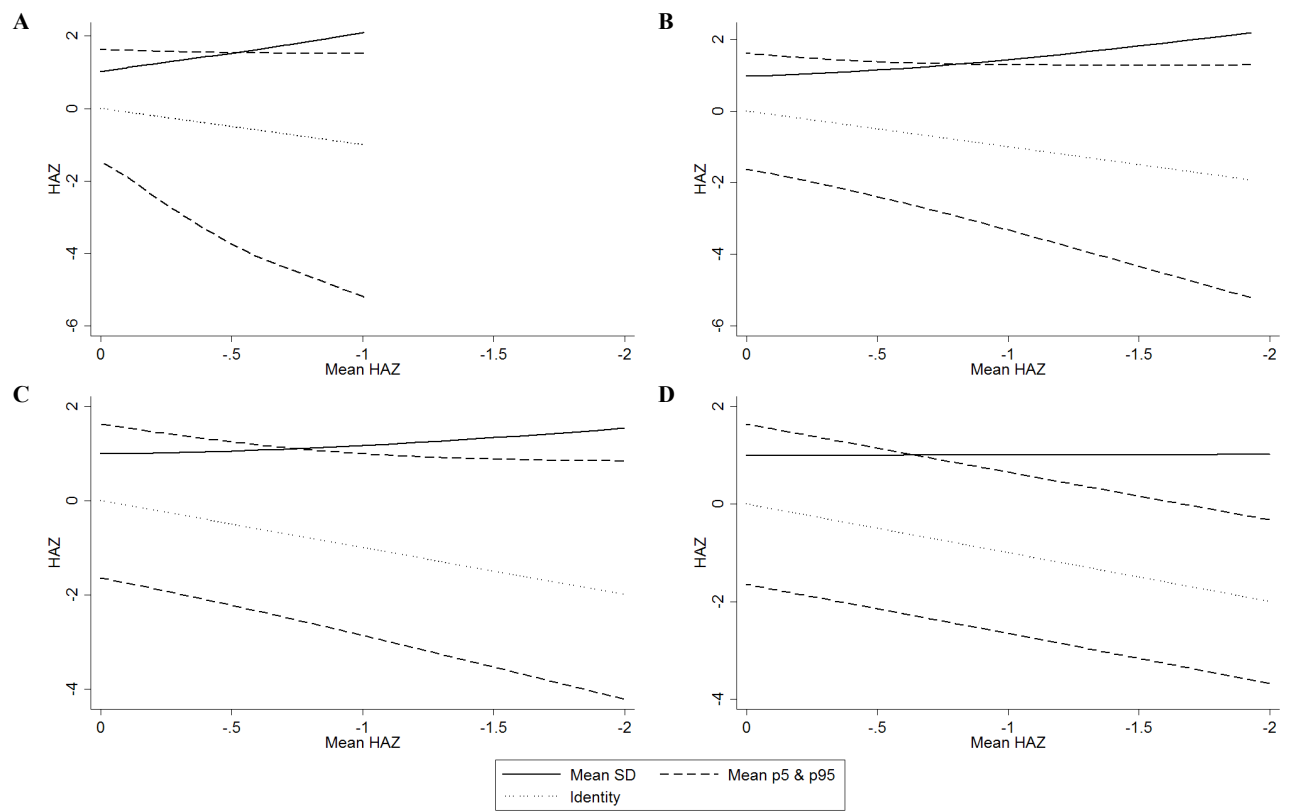

Figure S8. Figure legend on next page

**Figure S8.** Simulations with a floor effect. The effect of a set of growth-limiting exposures on the standard deviation (SD), 5th percentile (p5) and 95th percentile (p95) of the height-for-age z-score (HAZ) distribution was simulated in a population of 10,000 children with an initial mean HAZ=0 and SD=1. Monte Carlo simulation (1000 repetitions) was used to simulate a faltering process in which the mean HAZ declined from 0 to -2 via cumulative 0.1 decrements in a fixed group of 'exposed' children. Lines represent smoothed trends of the average SD, p5 and p95. Scenarios A-D differ only with respect to the proportion of the population that was randomly selected to be exposed to the set of growth-limiting factors (A=25%, B=50%, C=75%, D=100%).

A floor effect was imposed, whereby those children with  $HAZ < -6$  were simulated to have died or been censored. In Panels A and B, the simulation ended prior to mean  $HAZ = -2$  when all exposed children had  $HAZ < -6$  (and therefore mean HAZ could no longer decline).

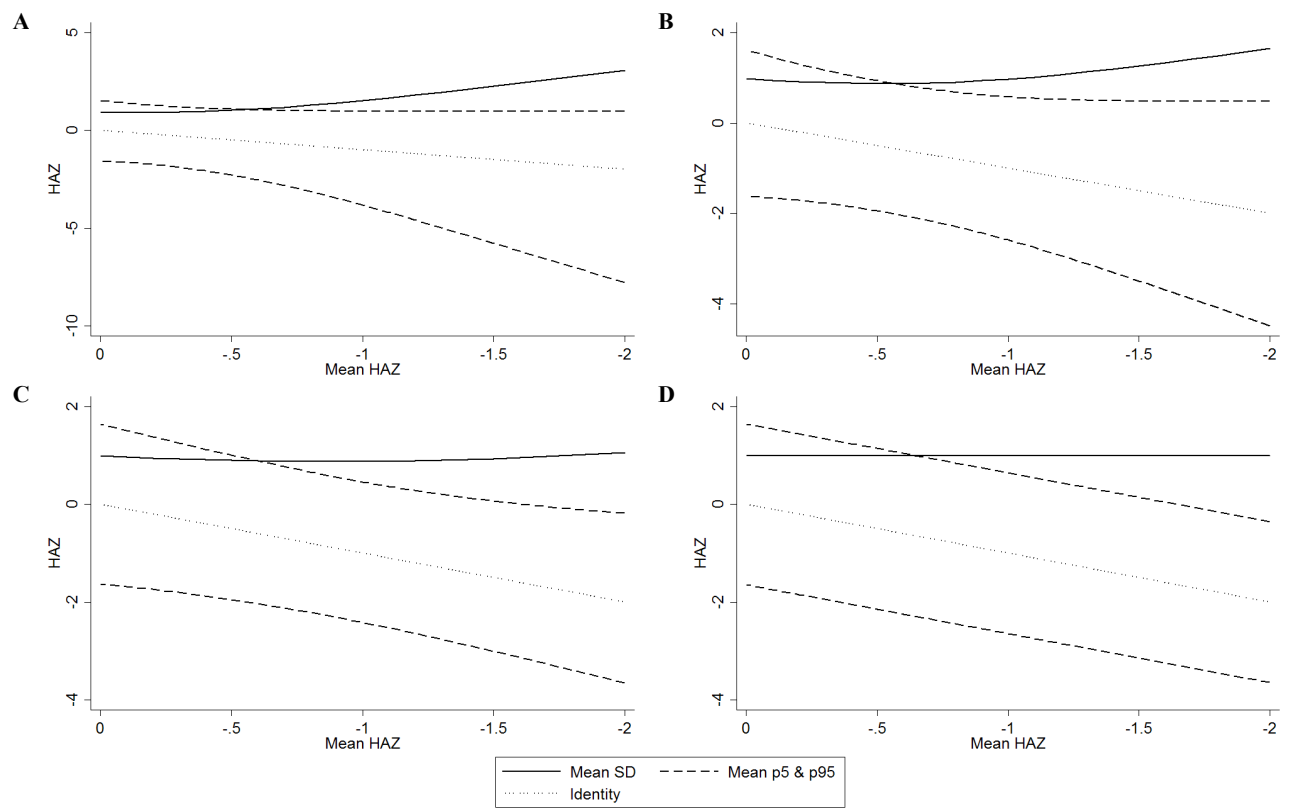

Figure S9. Figure legend on next page

**Figure S9.** Simulations with a higher risk of exposure at higher HAZ. The effect of a set of growth-limiting exposures on the standard deviation (SD), 5th percentile (p5) and 95th percentile (p95) of the height-for-age z-score (HAZ) distribution was simulated in a population of 10,000 children with an initial mean HAZ=0 and SD=1. Monte Carlo simulation (1000 repetitions) was used to simulate a faltering process in which the mean HAZ declined from 0 to -2 via cumulative 0.1 decrements in a fixed group of 'exposed' children. Lines represent smoothed trends of the average SD, p5 and p95. Scenarios A-D differ only with respect to the proportion of the population that was selected to be exposed to the set of growth-limiting factors (A=25%, B=50%, C=75%, D=100%).

Children with higher HAZ at the start of the simulation were preferentially selected into the exposure group (e.g., in Scenario A, we selected the 2,500 children with the highest HAZ values).



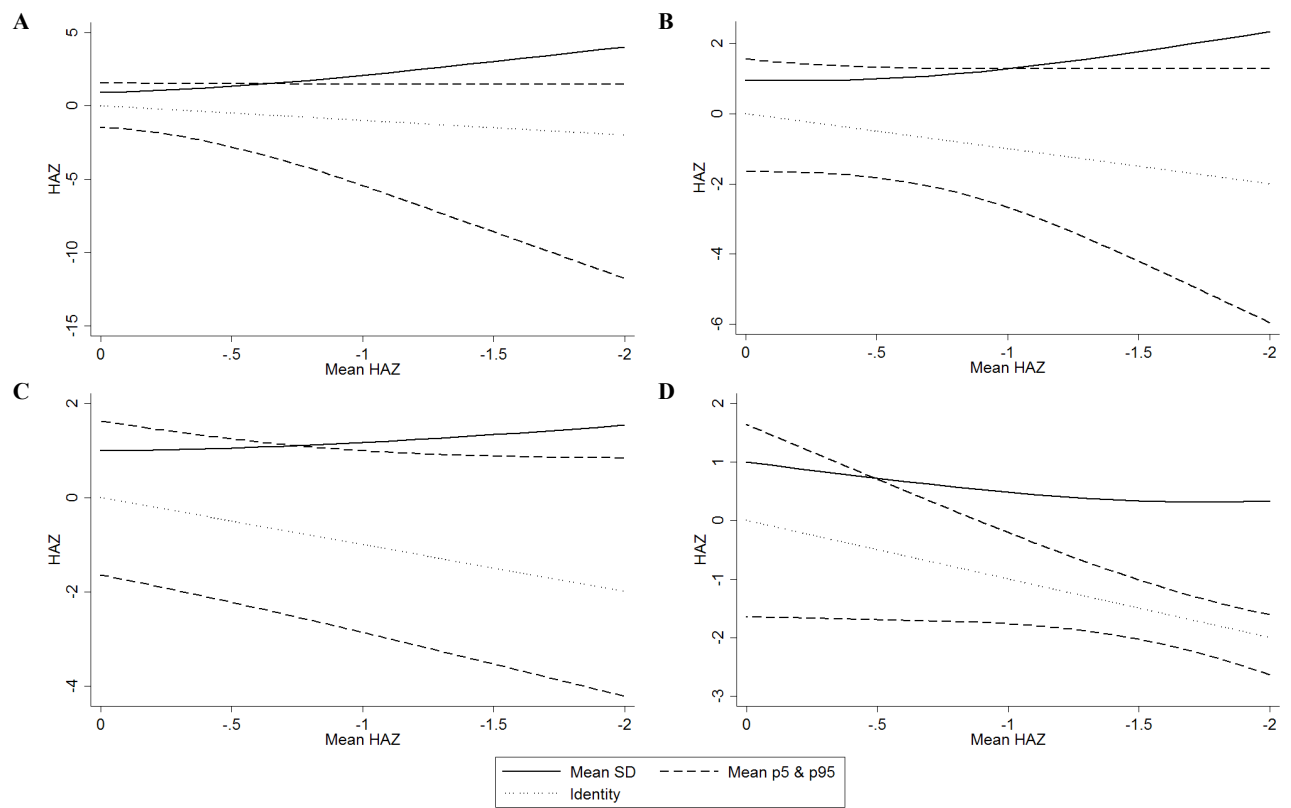

Figure S10. Figure legend on next page

**Figure S10.** Simulations with a higher magnitude of HAZ deficit for children with higher baseline HAZ. The effect of a set of growth-limiting exposures on the standard deviation (SD), 5th percentile (p5) and 95th percentile (p95) of the height-for-age z-score (HAZ) distribution was simulated in a population of 10,000 children with an initial mean HAZ=0 and SD=1. Monte Carlo simulation (1000 repetitions) was used to simulate a faltering process in which the mean HAZ declined from 0 to -2 via cumulative 0.1 decrements in a fixed group of ‘exposed’ children. Lines represent smoothed trends of the average SD, p5 and p95. Scenarios A-D differ only with respect to the proportion of the population that was randomly selected to be exposed to the set of growth-limiting factors (A=25%, B=50%, C=75%, D=100%).

The HAZ distribution at baseline was converted to an inverse normal probability distribution; in the exposed group, each child’s probability value was used to calculate the proportional deficit incurred at each step of the simulation. Therefore, children with higher HAZ at the start of the simulation had relatively higher-magnitude decrements.

Lines represent smoothed trends of the average SD, p5 and p95.
